# Supplementary material for: Analysis of the multi-physiological and functional mechanism of wheat alkylresorcinols based on reverse molecular docking and network pharmacology
Source: Royal Society of Chemistry journal article supplement (doi:10.1039/d2fo01438f), 2022-01-01
Supplement: d2fo01438f1.pdf [file d2fo01438f1.pdf]

**Table S1 The Pharmacokinetics of ARs and its endogenous metabolites.**

| <b>Molecule</b> | <b>CYP1A2<br/>inhibitor</b> | <b>CYP2C19<br/>inhibitor</b> | <b>CYP2C9<br/>inhibitor</b> | <b>CYP2D6<br/>inhibitor</b> | <b>CYP3A4<br/>inhibitor</b> |
|-----------------|-----------------------------|------------------------------|-----------------------------|-----------------------------|-----------------------------|
| AR-C25          | No                          | No                           | No                          | No                          | No                          |
| AR-C23          | No                          | Yes                          | No                          | No                          | No                          |
| AR-C21          | No                          | Yes                          | No                          | No                          | No                          |
| AR-C19          | Yes                         | Yes                          | No                          | No                          | No                          |
| AR-C17          | Yes                         | Yes                          | No                          | No                          | No                          |
| AR-C15          | Yes                         | Yes                          | No                          | Yes                         | No                          |
| 3,5-DHPHTA      | No                          | No                           | No                          | No                          | No                          |
| 3,5-DHPHTA-G    | No                          | No                           | No                          | No                          | No                          |
| 3,5-DHPHTA-S    | No                          | No                           | No                          | No                          | No                          |
| 3,5-DHPPTA      | No                          | No                           | No                          | No                          | No                          |
| 3,5-DHPPTA-G    | No                          | No                           | No                          | No                          | No                          |
| 3,5-DHPPTA-S    | No                          | No                           | No                          | No                          | No                          |
| 3,5-DHPPTA-Gly  | No                          | No                           | No                          | No                          | No                          |
| 3,5-DHPPA       | No                          | No                           | No                          | No                          | No                          |
| 3,5-DHPPA-G     | No                          | No                           | No                          | No                          | No                          |
| 3,5-DHPPA-S     | No                          | No                           | No                          | No                          | No                          |
| 3,5-DHPPA-Glu   | No                          | No                           | No                          | No                          | No                          |
| 3,5-DHPPA-Gly   | No                          | No                           | No                          | No                          | No                          |
| 3,5-DHBA        | No                          | No                           | No                          | No                          | No                          |
| 3,5-DHBA-G      | No                          | No                           | No                          | No                          | No                          |
| 3,5-DHBA-S      | No                          | No                           | No                          | No                          | No                          |
| 3,5-DHBA-Gly    | No                          | No                           | No                          | No                          | No                          |
| 3,5-DHBA-G,S    | No                          | No                           | No                          | No                          | No                          |

**Table S2. Common target information of compound targets and different disease targets**

| Disease target type     | Intersection target <sup>a</sup> | Common target <sup>b</sup>                                                                                                           | Top 20 target <sup>c</sup>                           |
|-------------------------|----------------------------------|--------------------------------------------------------------------------------------------------------------------------------------|------------------------------------------------------|
| Cancer                  | 161                              | AKR1C3 CYP11A1 CHEK1 IDE PDE4D RXRG KIF11 ITK MAPK14<br>NR1D2 GC AZGP1 HMOX1 CSDE1 CITED2 EP300 PPP2R1A RPA1                         |                                                      |
| Disorders of metabolism | 143                              | HSD17B11 HSD17B4 LCK ALOX12 RGS6 SOD2 ADORA2A PTPN1<br>ARL2 ACVR1 RNASE2 RANBP2 MTAP PPARA ARSA NR4A2 HLA-B                          | HSP90AA1 MAPK14<br>MMP9 EP300 PPARG                  |
| Cardiovascular disease  | 135                              | ADAM17 AR MAOB AKR1B1 HEXA UNC45A CA2 LTF ESR2<br>HSP90AB1 MMUT ABL2 JAK2 FGF1 PPARG EHMT1 FBP1 CUL5 FUT8                            | HMOX1 ERBB2 PARP1<br>SOD2 PPARA CHEK1                |
| Nervous system diseases | 117                              | AMD1 NPC1 F2 ARHGEF12 NQO2 CA9 USH1C PRKG1 CAMK4 RET<br>B2M MID1 PAX6 POLB PIK3CG KAT2B TAGLN2 PRPS1 PDE10A                          | JAK2 AR HSP90AB1<br>RPA1 RPA3 POLB B2M<br>KAT2B ESR2 |
| Immune system diseases  | 155                              | METAP2 BST1 MTRR GCDH HIF1AN BMPR1B REN PNP FOLH1<br>RUNX1T1 HSP90AA1 FOXM1 TNKS RPA3 RAB7A PIM1 PDE3B CUL1<br>MMP9 PARP1 CHKB ERBB2 |                                                      |

a: The intersections number of compound targets and different disease targets; b: The common targets of compound targets and different disease targets. c: The cytoHubba plug-in screens out the top 20 targets in the comment target.

**Table S3. The top 20 target information of compound targets and different disease targets**

| Disease target type     | Top 20 target <sup>a</sup>  |                            | The association of target and compound |                |              |                |              |              |
|-------------------------|-----------------------------|----------------------------|----------------------------------------|----------------|--------------|----------------|--------------|--------------|
|                         | Special target <sup>b</sup> | Common target <sup>c</sup> | Target                                 | Compound       | Target       | Compound       | Target       | Compound     |
| Cancer                  | KIF11                       |                            |                                        | AR-C17         |              | 3,5-DHPHTA-G   |              |              |
|                         | RXRG                        | EP300                      | EP300                                  | AR-C19         | ERBB2        | 3,5-DHPHTA-S   | CHEK1        | 3,5-DHPPTA-G |
|                         | RXRB                        | HSP90AA1                   |                                        | AR-C21         |              | 3,5-DHPPTA     |              |              |
| Disorders of metabolism |                             | MAPK14                     |                                        |                |              | 3,5-DHPPTA-G   |              |              |
|                         | KIF11                       | PPARA                      |                                        | AR-C17         |              | 3,5-DHPPTA-Gly |              |              |
|                         | RXRG                        | AR                         | HSP90AA1                               | AR-C19         | KAT2B        |                | FOXM1        | AR-C19       |
| Cardiovascular disease  | RXRB                        | HSD17B4                    |                                        | 3,5-DHPPTA-Gly | CUL1         | AR-C15         |              | AR-C21       |
|                         | SRM                         | ERBB2                      | MAPK14                                 |                |              |                |              |              |
|                         | RXRG                        | KAT2B                      | PPARG                                  | AR-C19         | HSP90AB1     | 3,5-DHPPTA-S   | RPA1         | 3,5-DHPHTA-S |
| Nervous system diseases | RXRB                        | HSP90AB1                   | RXRB                                   |                |              | 3,5-DHPPA-G    |              |              |
|                         |                             | LCK                        |                                        |                | LCK          |                |              |              |
|                         | CUL1                        | JAK2                       | PPARA                                  |                | PPP2R1A      | AR-C17         | SRM          | 3,5-DHPPA-G  |
| Immune system diseases  | B2M                         | CITED2                     | B2M                                    | AR-C15         |              |                |              |              |
|                         | UNC45A                      | CHEK1                      |                                        |                | KIF11        |                |              |              |
|                         |                             | FOXM1                      | AR                                     | AR-C25         | JAK2         | AR-C17         | UNC45A       | 3,5-DHPHTA-S |
|                         | RPA1                        |                            |                                        |                | 3,5-DHPPTA-G |                | 3,5-DHPHTA-G |              |
|                         | CUL5                        | PPP2R1A                    |                                        | AR-C15 AR-C17  |              | 3,5-DHPPTA-Gly |              |              |
|                         | RXRG                        | PPARG                      |                                        |                |              | AR-C15 AR-C17  |              |              |
|                         | RXRB                        |                            | HSD17B4                                | AR-C19 AR-C21  | CITED2       | AR-C19 AR-C21  | CUL5         | 3,5-DHPPTA-S |
|                         |                             |                            |                                        | AR-C23 AR-C25  |              | AR-C23 AR-C25  |              |              |

a: The intersections number of compound targets and different disease targets; b: The common targets of compound targets and different disease targets. c: The cytoHubba plug-in screens out the top 20 targets in the comment target.

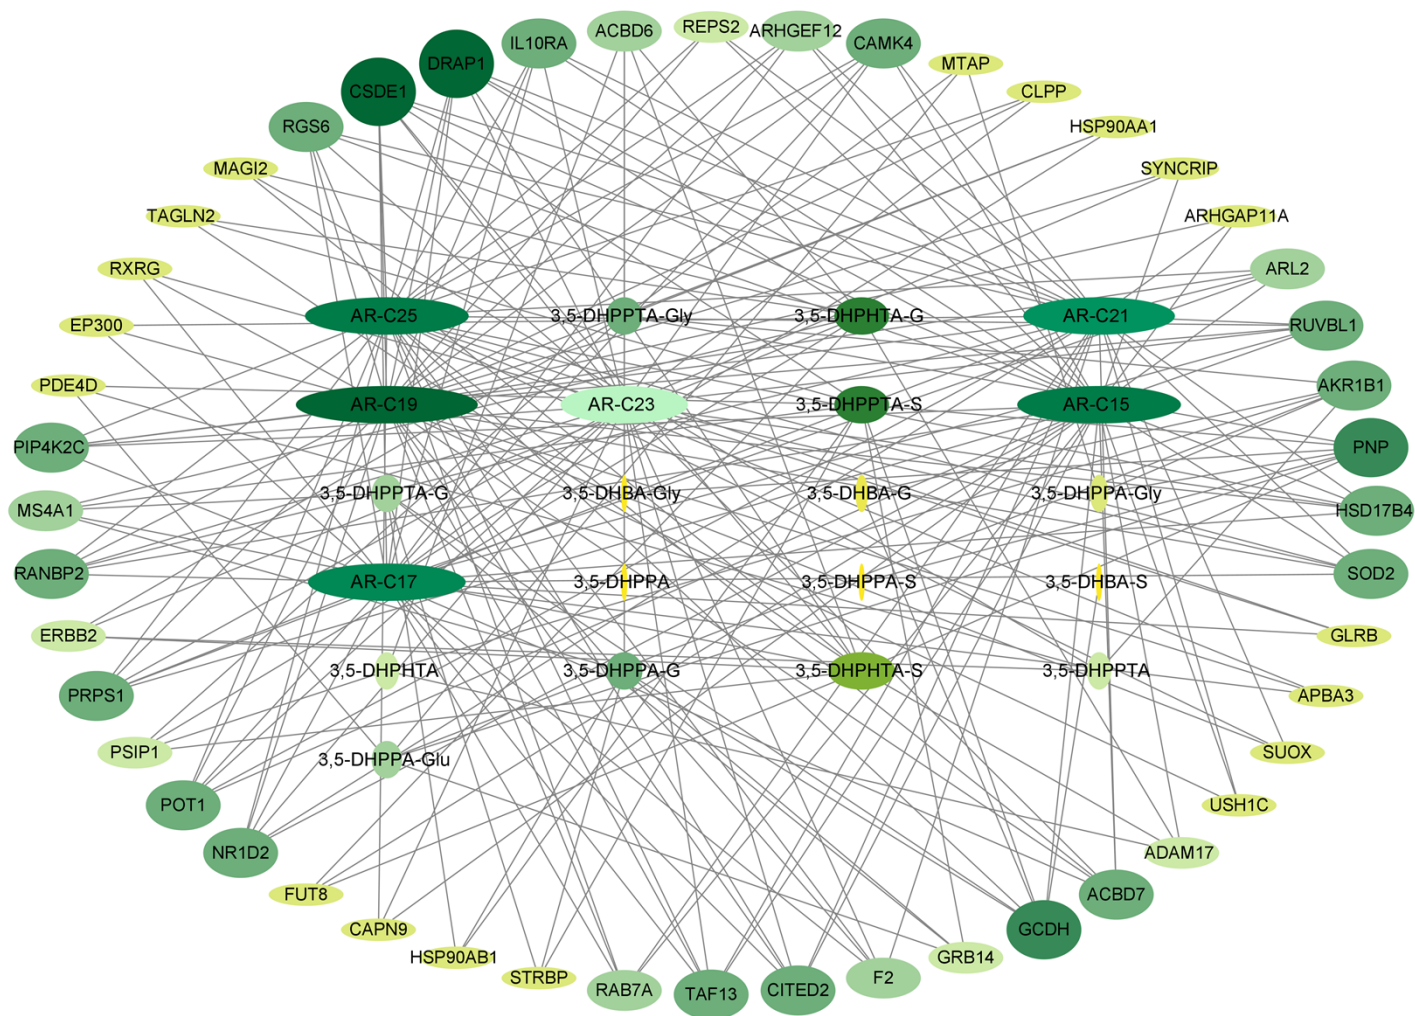

**Fig. S1. The degree of association between different compounds and the target (degree $\geq$ 3) .**

**Table S4. Enrichment analysis results of biological processes**

| Term ID    | Description                                                                                     | P value     | Count | Symbols                                                                              |
|------------|-------------------------------------------------------------------------------------------------|-------------|-------|--------------------------------------------------------------------------------------|
| GO:0007167 | enzyme linked receptor protein signaling pathway                                                | 1.35495E-10 | 14    | PARP1 MAPK14 ERBB2 FUT8 GRB14 JAK2 LCK MMP9 PPARG ADAM17 CUL5 REPS2 MAGI2 CITED2     |
| GO:0009725 | response to hormone                                                                             | 1.95819E-10 | 15    | PARP1 AR MAPK14 EP300 ESR2 GRB14 HMOX1 JAK2 PPARA PPARG RXRB RXRG KAT2B NR1D2 CITED2 |
| GO:0048534 | hematopoietic or lymphoid organ development                                                     | 3.26448E-10 | 14    | PARP1 B2M CAMK4 MS4A1 MAPK14 EP300 JAK2 LCK MMP9 POLB PPARG SOD2 ADAM17 CITED2       |
| GO:0009755 | hormone-mediated signaling pathway                                                              | 6.15739E-10 | 8     | AR ESR2 JAK2 PPARA PPARG RXRB RXRG NR1D2                                             |
| GO:0002520 | immune system development                                                                       | 7.1248E-10  | 14    | PARP1 B2M CAMK4 MS4A1 MAPK14 EP300 JAK2 LCK MMP9 POLB PPARG SOD2 ADAM17 CITED2       |
| GO:0002521 | leukocyte differentiation                                                                       | 8.05703E-10 | 11    | PARP1 B2M CAMK4 MS4A1 MAPK14 EP300 LCK MMP9 PPARG ADAM17 CITED2                      |
| GO:0030097 | hemopoiesis                                                                                     | 1.41399E-09 | 13    | PARP1 B2M CAMK4 MS4A1 MAPK14 EP300 JAK2 LCK MMP9 PPARG SOD2 ADAM17 CITED2            |
| GO:0030522 | intracellular receptor signaling pathway                                                        | 1.62028E-09 | 8     | AR ESR2 JAK2 PPARA PPARG RXRB RXRG NR1D2                                             |
| GO:0034654 | nucleobase-containing compound biosynthetic process                                             | 1.35429E-08 | 13    | PARP1 GCDH HSP90AA1 HSP90AB1 MTAP PNP POLB PPARG PRPS1 RPA1 TAF13 DRAP1 POT1         |
| GO:0032870 | cellular response to hormone stimulus                                                           | 1.48016E-08 | 11    | PARP1 AR ESR2 GRB14 JAK2 PPARA PPARG RXRB RXRG KAT2B NR1D2                           |
| GO:0090092 | regulation of transmembrane receptor protein serine/threonine kinase signaling pathway          | 1.50523E-08 | 9     | PARP1 EP300 HSP90AB1 JAK2 PPARA PPARG ADAM17 MAGI2 CITED2                            |
| GO:0090100 | positive regulation of transmembrane receptor protein serine/threonine kinase signaling pathway | 1.55506E-08 | 7     | PARP1 EP300 HSP90AB1 JAK2 PPARG ADAM17 CITED2                                        |
| GO:0043401 | steroid hormone mediated signaling pathway                                                      | 2.22256E-08 | 6     | AR ESR2 JAK2 PPARA RXRB RXRG                                                         |
| GO:0000723 | telomere maintenance                                                                            | 3.58858E-08 | 6     | PARP1 HSP90AA1 HSP90AB1 RPA1 RPA3 POT1                                               |
| GO:0018130 | heterocycle biosynthetic process                                                                | 4.14893E-08 | 13    | PARP1 GCDH HSP90AA1 HSP90AB1 MTAP PNP POLB PPARG PRPS1 RPA1 TAF13 DRAP1 POT1         |
| GO:0019438 | aromatic compound biosynthetic process                                                          | 4.73333E-08 | 13    | PARP1 GCDH HSP90AA1 HSP90AB1 MTAP PNP POLB PPARG PRPS1 RPA1 TAF13 DRAP1 POT1         |
| GO:0097193 | intrinsic apoptotic signaling pathway                                                           | 6.32464E-08 | 7     | EP300 HMOX1 JAK2 POLB SOD2 CUL5 CUL1                                                 |
| GO:0030099 | myeloid cell differentiation                                                                    | 8.13044E-08 | 8     | PARP1 CAMK4 MAPK14 EP300 JAK2 MMP9 PPARG CITED2                                      |
| GO:0051099 | positive regulation of binding                                                                  | 1.77869E-07 | 7     | PARP1 B2M EP300 HSP90AB1 JAK2 MMP9 PPARG                                             |
| GO:0007004 | telomere maintenance via telomerase                                                             | 2.09939E-07 | 4     | HSP90AA1 HSP90AB1 RPA1 POT1                                                          |

**Table S5. Enrichment analysis results of molecular functions**

| Term       | Description                                                         | P value     | Count | Symbols                                                            |
|------------|---------------------------------------------------------------------|-------------|-------|--------------------------------------------------------------------|
| GO:0004879 | nuclear receptor activity                                           | 3.97542E-11 | 7     | AR ESR2 PPARA PPARG RXR RXRG NR1D2                                 |
| GO:0098531 | ligand-activated transcription factor activity                      | 3.97542E-11 | 7     | AR ESR2 PPARA PPARG RXR RXRG NR1D2                                 |
| GO:0008134 | transcription factor binding                                        | 1.58114E-07 | 11    | PARP1 AR MAPK14 EP300 PPARA PPARG TAF13 RUVBL1 KAT2B CITED2 DRAP1  |
| GO:0003707 | steroid hormone receptor activity                                   | 3.03867E-07 | 4     | ESR2 PPARA RXR RXRG                                                |
| GO:0023026 | MHC class II protein complex binding                                | 4.99166E-07 | 4     | B2M MS4A1 HSP90AA1 HSP90AB1                                        |
| GO:0003684 | damaged DNA binding                                                 | 6.1919E-07  | 5     | EP300 POLB RPA1 RPA3 POT1                                          |
| GO:0019904 | protein domain specific binding                                     | 6.66387E-07 | 11    | AR CHEK1 FUT8 HSP90AA1 HSP90AB1 JAK2 LCK PPARA PPARG ADAM17 CITED2 |
| GO:0051117 | ATPase binding                                                      | 1.57937E-06 | 5     | AR LCK PDE4D CLPP RUVBL1                                           |
| GO:0023023 | MHC protein complex binding                                         | 1.64848E-06 | 4     | B2M MS4A1 HSP90AA1 HSP90AB1                                        |
| GO:0019901 | protein kinase binding                                              | 4.2426E-06  | 10    | PARP1 MAPK14 FOXM1 GRB14 HSP90AA1 HSP90AB1 JAK2 KIF11 LCK KAT2B    |
| GO:0008022 | protein C-terminus binding                                          | 4.49414E-06 | 6     | EP300 ERBB2 JAK2 LCK PPARG TAF13                                   |
| GO:0140296 | general transcription initiation factor binding                     | 7.36138E-06 | 4     | AR TAF13 RUVBL1 DRAP1                                              |
| GO:0019900 | kinase binding                                                      | 1.15993E-05 | 10    | PARP1 MAPK14 FOXM1 GRB14 HSP90AA1 HSP90AB1 JAK2 KIF11 LCK KAT2B    |
| GO:0140297 | DNA-binding transcription factor binding                            | 1.59435E-05 | 8     | PARP1 AR MAPK14 EP300 PPARA PPARG KAT2B CITED2                     |
| GO:0061629 | RNA polymerase II-specific DNA-binding transcription factor binding | 1.92763E-05 | 7     | PARP1 AR MAPK14 EP300 PPARA PPARG CITED2                           |
| GO:0000062 | fatty-acyl-CoA binding                                              | 1.93473E-05 | 3     | GCDH ACBD6 ACBD7                                                   |
| GO:1901567 | fatty acid derivative binding                                       | 2.22114E-05 | 3     | GCDH ACBD6 ACBD7                                                   |
| GO:0001091 | RNA polymerase II general transcription initiation factor binding   | 2.5341E-05  | 3     | AR RUVBL1 DRAP1                                                    |
| GO:0017025 | TBP-class protein binding                                           | 2.87473E-05 | 3     | TAF13 RUVBL1 DRAP1                                                 |
| GO:0120227 | acyl-CoA binding                                                    | 2.87473E-05 | 3     | GCDH ACBD6 ACBD7                                                   |

**Table S6. Enrichment analysis results of cellular components**

| Term       | Description                                       | P value     | Count | Symbols                                                |
|------------|---------------------------------------------------|-------------|-------|--------------------------------------------------------|
| GO:1904813 | ficolin-1-rich granule lumen                      | 1.20605E-05 | 5     | MAPK14 HSP90AA1 HSP90AB1 MMP9 PNP                      |
| GO:0032993 | protein-DNA complex                               | 1.42061E-05 | 6     | PARP1 EP300 RPA1 RPA3 RUVBL1 POT1                      |
| GO:0101002 | ficolin-1-rich granule                            | 8.1862E-05  | 5     | MAPK14 HSP90AA1 HSP90AB1 MMP9 PNP                      |
| GO:0090734 | site of DNA damage                                | 8.68975E-05 | 4     | PARP1 RPA1 RPA3 CUL5                                   |
| GO:0005667 | transcription regulator complex                   | 0.000153693 | 7     | PARP1 EP300 PPARG RXRB RXRG TAF13 DRAP1                |
| GO:0090575 | RNA polymerase II transcription regulator complex | 0.000226238 | 5     | PPARG RXRB RXRG TAF13 DRAP1                            |
| GO:0098687 | chromosomal region                                | 0.000241861 | 6     | PARP1 CHEK1 PPP2R1A RPA1 KAT2B POT1                    |
| GO:0048471 | perinuclear region of cytoplasm                   | 0.000309778 | 8     | ERBB2 HMOX1 HSP90AA1 HSP90AB1 PDE4D APBA3 MAGI2 UNC45A |
| GO:0140535 | intracellular protein-containing complex          | 0.000378639 | 8     | EP300 HSP90AB1 PPP2R1A TAF13 CUL5 CUL1 RUVBL1 KAT2B    |
| GO:0005657 | replication fork                                  | 0.000402882 | 3     | CHEK1 RPA1 RPA3                                        |
| GO:1990234 | transferase complex                               | 0.000577474 | 8     | EP300 PRPS1 RANBP2 TAF13 CUL5 CUL1 RUVBL1 KAT2B        |
| GO:0000781 | chromosome, telomeric region                      | 0.000676185 | 4     | PARP1 CHEK1 RPA1 POT1                                  |
| GO:0034774 | secretory granule lumen                           | 0.00104065  | 5     | B2M MAPK14 HSP90AA1 HSP90AB1 PNP                       |
| GO:0060205 | cytoplasmic vesicle lumen                         | 0.001084375 | 5     | B2M MAPK14 HSP90AA1 HSP90AB1 PNP                       |
| GO:0045121 | membrane raft                                     | 0.001099249 | 5     | MS4A1 HMOX1 JAK2 LCK ADAM17                            |
| GO:0031983 | vesicle lumen                                     | 0.001114274 | 5     | B2M MAPK14 HSP90AA1 HSP90AB1 PNP                       |
| GO:0098857 | membrane microdomain                              | 0.001114274 | 5     | MS4A1 HMOX1 JAK2 LCK ADAM17                            |
| GO:0000123 | histone acetyltransferase complex                 | 0.001191805 | 3     | EP300 RUVBL1 KAT2B                                     |
| GO:0031248 | protein acetyltransferase complex                 | 0.001629853 | 3     | EP300 RUVBL1 KAT2B                                     |
| GO:1902493 | acetyltransferase complex                         | 0.001629853 | 3     | EP300 RUVBL1 KAT2B                                     |

**Table S7. Enrichment analysis results of KEGG pathway.**

| Term     | Description                                 | P value     | Count | Symbols                                                                               |
|----------|---------------------------------------------|-------------|-------|---------------------------------------------------------------------------------------|
| hsa05200 | Pathways in cancer                          | 1.78705E-12 | 15    | AR EP300 ERBB2 ESR2 F2 HMOX1 HSP90AA1 HSP90AB1 JAK2 MMP9 PPARG RXR RXRG CUL1 ARHGFE12 |
| hsa05417 | Lipid and atherosclerosis                   | 2.28549E-09 | 9     | MAPK14 HSP90AA1 HSP90AB1 JAK2 MMP9 PPARG RXR RXRG SOD2                                |
| hsa04659 | Th17 cell differentiation                   | 7.45563E-09 | 7     | MAPK14 HSP90AA1 HSP90AB1 JAK2 LCK RXR RXRG                                            |
| hsa05207 | Chemical carcinogenesis-receptor activation | 4.19423E-08 | 8     | AR ESR2 HSP90AA1 HSP90AB1 JAK2 PPARA RXR RXRG                                         |
| hsa05215 | Prostate cancer                             | 1.23346E-07 | 6     | AR EP300 ERBB2 HSP90AA1 HSP90AB1 MMP9                                                 |
| hsa05152 | Tuberculosis                                | 4.64042E-06 | 6     | MAPK14 EP300 IL10RA JAK2 RAB7A ARHGFE12                                               |
| hsa05166 | Human T-cell leukemia virus 1 infection     | 1.53427E-05 | 6     | B2M CHEK1 EP300 LCK POLB KAT2B                                                        |
| hsa05418 | Fluid shear stress and atherosclerosis      | 2.09501E-05 | 5     | MAPK14 HMOX1 HSP90AA1 HSP90AB1 MMP9                                                   |
| hsa04920 | Adipocytokine signaling pathway             | 2.27994E-05 | 4     | JAK2 PPARA RXR RXRG                                                                   |
| hsa03320 | PPAR signaling pathway                      | 3.17113E-05 | 4     | PPARA PPARG RXR RXRG                                                                  |
| hsa04657 | IL-17 signaling pathway                     | 7.68937E-05 | 4     | MAPK14 HSP90AA1 HSP90AB1 MMP9                                                         |
| hsa01522 | Endocrine resistance                        | 9.04329E-05 | 4     | MAPK14 ERBB2 ESR2 MMP9                                                                |
| hsa05216 | Thyroid cancer                              | 9.51431E-05 | 3     | PPARG RXR RXRG                                                                        |
| hsa05202 | Transcriptional misregulation in cancer     | 9.74997E-05 | 5     | FUT8 MMP9 PPARG RXR RXRG                                                              |
| hsa05170 | Human immunodeficiency virus 1 infection    | 0.000155009 | 5     | B2M CHEK1 MAPK14 CUL5 CUL1                                                            |
| hsa04151 | PI3K-Akt signaling pathway                  | 0.000202215 | 6     | ERBB2 HSP90AA1 HSP90AB1 JAK2 PPP2R1A MAGI2                                            |
| hsa04919 | Thyroid hormone signaling pathway           | 0.000204088 | 4     | EP300 RXR RXRG KAT2B                                                                  |
| hsa04380 | Osteoclast differentiation                  | 0.000253087 | 4     | CAMK4 MAPK14 LCK PPARG                                                                |
| hsa04114 | Oocyte meiosis                              | 0.000276475 | 4     | AR MAPK14 PPP2R1A CUL1                                                                |
| hsa04915 | Estrogen signaling pathway                  | 0.000337031 | 4     | ESR2 HSP90AA1 HSP90AB1 MMP9                                                           |



**Table S8. List of ARs-related targets reported in the literature.**

| Compound | Testing object                                   | Related targets                                                                      | Result                                                                                                                                                                                                                                   | References |
|----------|--------------------------------------------------|--------------------------------------------------------------------------------------|------------------------------------------------------------------------------------------------------------------------------------------------------------------------------------------------------------------------------------------|------------|
| ARs      | human adrenocortical cell line H295R             | CYP17A1, CYP21A2, HSD3B2, CYP19A1, CYP11A1                                           | The suppressed synthesis of testosterone and estradiol by ARs suggest a novel mechanism for ARs in the chemoprevention of prostate and breast cancer.                                                                                    | [46]       |
| ARs      | RAW264.7 macrophage cells                        | IL-1 $\beta$ , IL-6, TNF- $\alpha$ , NF- $\kappa$ B(NFKB1), JNK(MAPK8), IKBA(NFKBIA) | ARs treatment notably decreased NF- $\kappa$ B p65 nuclear translocation and inhibitor $\kappa$ B (I $\kappa$ B $\alpha$ ) kinase and JNK phosphorylation                                                                                | [52]       |
| ARs      | Human ColonCancer Cells                          | p53(TP53), PUMA(BBC3), p21(TCEAL1), Mdm2                                             | AR C15 and AR C17 can specifically activate the mitochondrial pathway of apoptosis and cause cell-cycle arrest and that inhibition of p53 greatly reduces the activation of this pathway.                                                | [49]       |
| ARs      | human retinal pigment epithelium cells (ARPE-19) | Nrf2(GABPA), HO-1(HMOX1)                                                             | ARs could protect ARPE-19 cells from oxidative stress induced cell damage possibly through Akt dependent Nrf2/HO-1 signaling                                                                                                             | [19]       |
| ARs      | HepG2 Cells                                      | LC3-II (ATG16L1), RhoA, MMP-7, PI3K, Akt mTOR                                        | ARs can activate autophagy and suppresses the biological behaviors of HepG2 cells by inhibiting the activation of MMP-7, Rho/Rho-associated protein kinase, and activation of the phosphatidylinositol 3-kinase/Akt signaling pathway.   | [47]       |
| AR-C17   | Human breast cancer MDA-MB-231 cells             | Bax, Bcl-2(BAD), LC3-II(ATG16L1)                                                     | AR-C17 could inhibit proliferation of human triple-negative breast cancer MDA-MB-231 cells through increasing cell apoptosis and autophagy .                                                                                             | [50]       |
| ARs      | Mouse hippocampal HT22 cells                     | Nrf2(GABPA), HO-1(HMOX1), NQO1, GCLC, GCLM                                           | Potential neuroprotection of wheat alkylresorcinols in hippocampal neurons via Nrf2/ARE pathway                                                                                                                                          | [21]       |
| AR-C17   | human MCF-7 breast cancer cells                  | Atg7, Beclin-1(BECN1), LC3-II, SQSTM1, p62, PI3K, Akt, mTOR                          | AR-C17 exerted anti-cancer activity through modulating PI3K/Akt/mTOR signaling pathway which was evidenced by decreasing the protein expression of PI3K, p-Akt and p-mTOR.                                                               | [48]       |
| AR-C17   | Rat pheochromocytoma (PC-12) cells               | SIRT3, FOXO3a                                                                        | 5-Heptadecylresorcinol attenuates oxidative damage and mitochondria-mediated apoptosis through activation of the SIRT3/FOXO3a signaling pathway in neurocytes                                                                            | [22]       |
| ARs      | 3T3-L1 adipocytes cell                           | p-Akt, GLUT4(SLC2A4)                                                                 | ARs ameliorated adipocyte insulin resistance by specifically activating the p-Akt/GLUT4signaling pathway.                                                                                                                                | [51]       |
| ARs      | Male mice                                        | Srebf2, Hmgcs1                                                                       | Alkylresorcinols significantly increased fecal cholesterol excretion by 39.6% and reduced blood cholesterol concentrations by 30.4%, while upregulating the expression of hepatic cholesterol synthetic genes such as Srebf2 and Hmgcs1. | [7]        |
| AR-C17   | APP/PS1 transgenic mice                          | ADAM10, PSD-95(DLG4), NLRP3, IL1B, SIRT3, SOD2                                       | AR-C17 can be applied as a potential functional food ingredient to ameliorate cognitive impairments and prevent Alzheimer's disease                                                                                                      | [23]       |
| AR-C17   | C57 BL/6J mice                                   | Sirt3, LC3B-II/I, Beclin1, Atg5, PINK1, Parkin                                       | Sirt3-mediated autophagy plays an essential role in alleviating adipocyte mitochondrial dysfunction by AR-C17                                                                                                                            | [53]       |
| ARs      | Drosophila melanogaster                          | SIRT1                                                                                | Alkylresorcinols activate SIRT1 and delay ageing in <i>Drosophila melanogaster</i>                                                                                                                                                       | [45]       |
